# Supplementary material for: Mind-controlled transgene expression by a wireless-powered optogenetic designer cell implant
Source: Springer Nature journal article supplement (doi:10.1038/ncomms6392), 2014-11-11
Supplement: 41467_2014_BFncomms6392_MOESM717_ESM.pdf [file 41467_2014_BFncomms6392_MOESM717_ESM.pdf]

# **Mind-controlled transgene expression by a wireless-powered optogenetic designer cell implant**

Marc Folcher<sup>1</sup>, Sabine Oesterle<sup>1</sup>, Katharina Zwicky<sup>1</sup>, Thushara Thekkottil<sup>1</sup>, Julie Heymoz<sup>1</sup>, Muriel Hohmann<sup>1</sup>, Matthias Christen<sup>1</sup>, Marie Daoud El-Baba<sup>2</sup>, Peter Buchmann<sup>1</sup>, Martin Fussenegger<sup>1,3</sup>

Correspondence should be addressed to M.F. (e-mail: [fussenegger@bsse.ethz.ch](mailto:fussenegger@bsse.ethz.ch))

## **Supplementary Information**

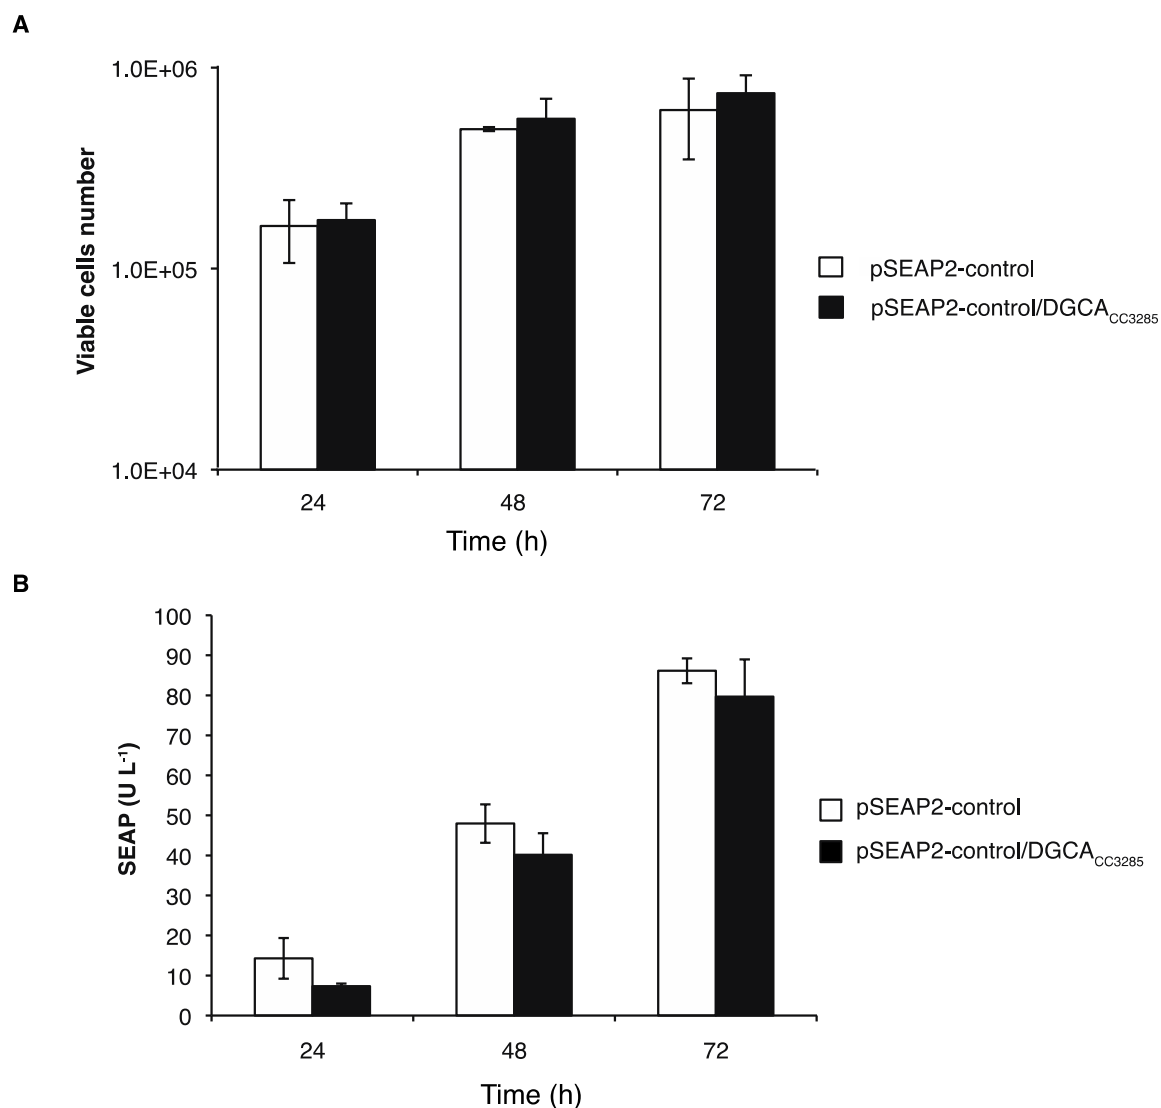

**Supplementary Figure 1 | Impact of constitutive diguanylate cyclase expression on the viability and metabolic capacity of mammalian cells.**  $5 \times 10^5$  HEK-293T were cotransfected with the constitutive *Caulobacter crescentus* diguanylate cyclase A (DGCA<sub>CC3285</sub>) expression vector pZKY121 (P<sub>SV40</sub>-DGCA<sub>CC3285</sub>-pA) and the constitutive SEAP expression vector pSEAP2-control (P<sub>SV40</sub>-SEAP-pA) and cell viability (a) as well as the SEAP production capacity (b) were profiled for up to 72h. Data are mean  $\pm$  SD; n=5, triplicate experiments.

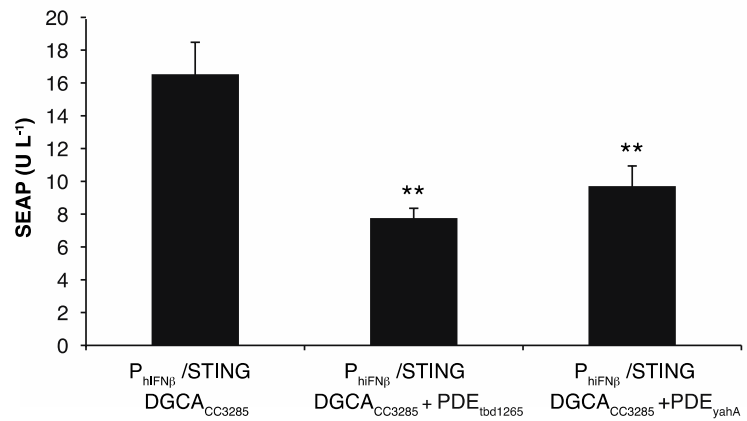

**Supplementary Figure 2 | Impact of constitutive PDE expression on the synthetic c-di-GMP-specific second messenger pathway.**  $5 \times 10^5$  HEK-293T containing pZKY121, pSTING and pSO1 were individually (co-)transfected with the c-di-GMP-specific phosphodiesterases PDE<sub>yahA</sub> (pZKY119; P<sub>SV40</sub>-PDE<sub>yahA</sub>-pA) or PDE<sub>TBD1265</sub> (pZKY120; P<sub>SV40</sub>-PDE<sub>TBD1265</sub>-pA) and SEAP expression was scored in the culture supernatant after 48h. Constitutive expression of either phosphodiesterase (PDE) reduced c-di-GMP-specific STING-mediated activation of P<sub>hIFNβ</sub>-driven SEAP expression. Data are mean  $\pm$  SD; statistics by two-tailed t test in comparison to control (P<sub>hIFNβ</sub>/ STING, DGCA<sub>CC3285</sub>); n=5, triplicate experiments, \*\* $P < 0.01$ .

P<sub>hIFN $\beta$</sub>  (pSO1) ATGACAGAGGAAAAGTCAAAGGGAGAACTGA  
P<sub>IFN(AC+)</sub> (pSO2) ATGACAAGGGGAAAAGTCAAAGGGAAACTGA  
P<sub>IFN(ACD+)</sub> (pSO3) ATGACAAGGGGAAAAGTCAAAGGGAA-CTGA

**Supplementary Figure 3 | Interferon- $\beta$  promoter variants.** Sequence alignment showing IRF3-optimised operator sites in different human interferon- $\beta$  (P<sub>hIFN $\beta$</sub> ) promoter variants. Point mutations and deletions are shown in red.

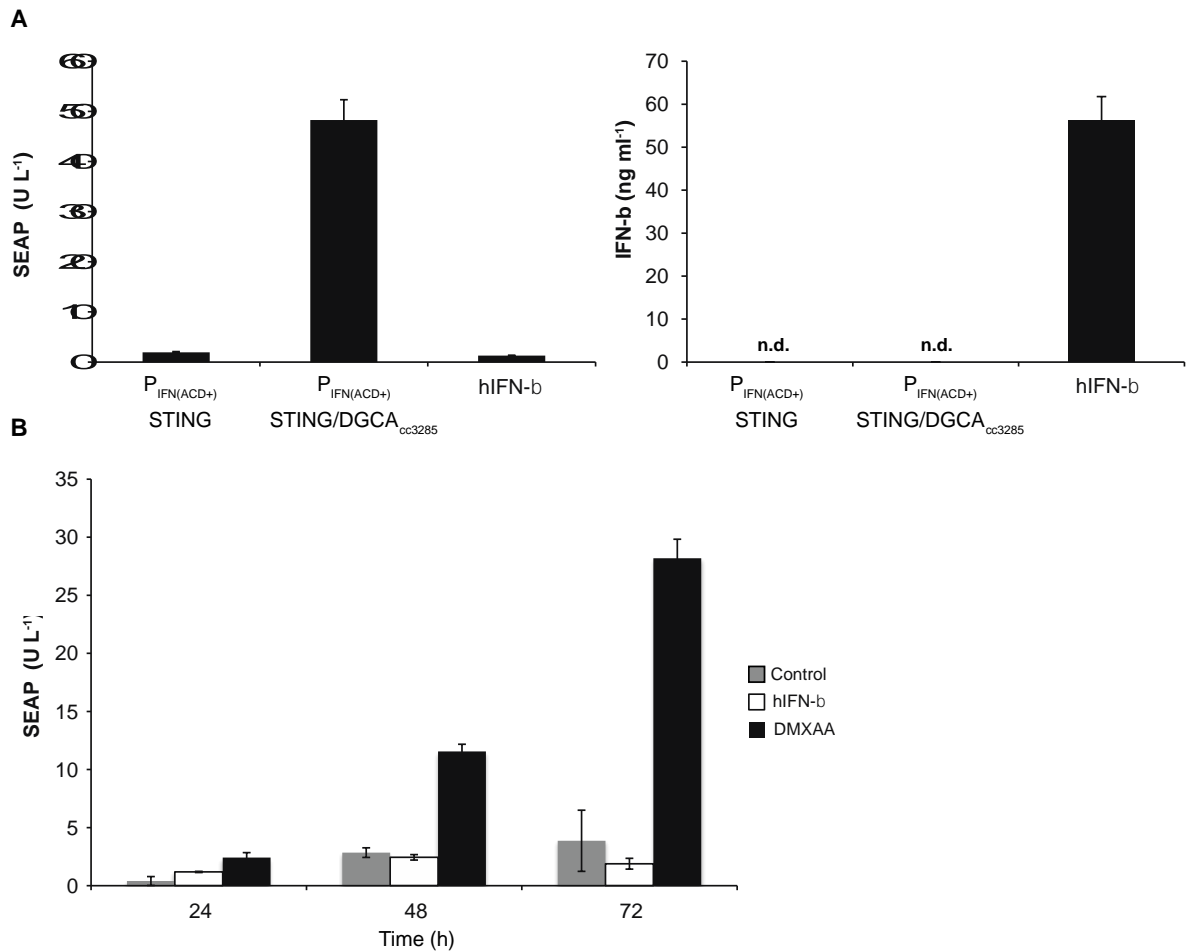

**Supplementary Figure 4 | Analysis of potential interference of the orthogonal c-di-GMP-based second messenger signalling pathway with hIFN- $\beta$  production and paracrine hIFN- $\beta$  signalling.** (a) The orthogonal c-di-GMP-based second messenger signalling pathway fails to induce endogenous hIFN- $\beta$  secretion in engineered HEK-293T.  $5 \times 10^4$  HEK-293T cells were cotransfected with pSTING (P<sub>hCMV</sub>-STING-pA) and pSO3 (P<sub>IFN(ACD+)</sub>-SEAP-pA) as well as optionally with pZKY121 (P<sub>SV40</sub>-DGCA<sub>CC3285</sub>-pA) and SEAP as well as hIFN- $\beta$  levels were profiled in the culture supernatant after 48h. HEK-293T transfected with the constitutive hIFN- $\beta$  expression vector pWW512 (P<sub>hEF1 $\alpha$</sub> -hIFN- $\beta$ -pA) were used as positive control. (b) Paracrine hIFN- $\beta$  has no impact on the orthogonal c-di-GMP-based second messenger signalling pathway.  $5 \times 10^4$  HEK-293T cells were cotransfected with pSTING (P<sub>hCMV</sub>-STING-pA) as well as pSO3 (P<sub>IFN(ACD+)</sub>-SEAP-pA) and exposed to recombinant hIFN- $\beta$  for 48h before SEAP expression was profiled in the culture supernatant. The STING-dependent type I interferon inducer DMXAA was used as positive control. Data are mean  $\pm$  SD; n=5, triplicate experiments.

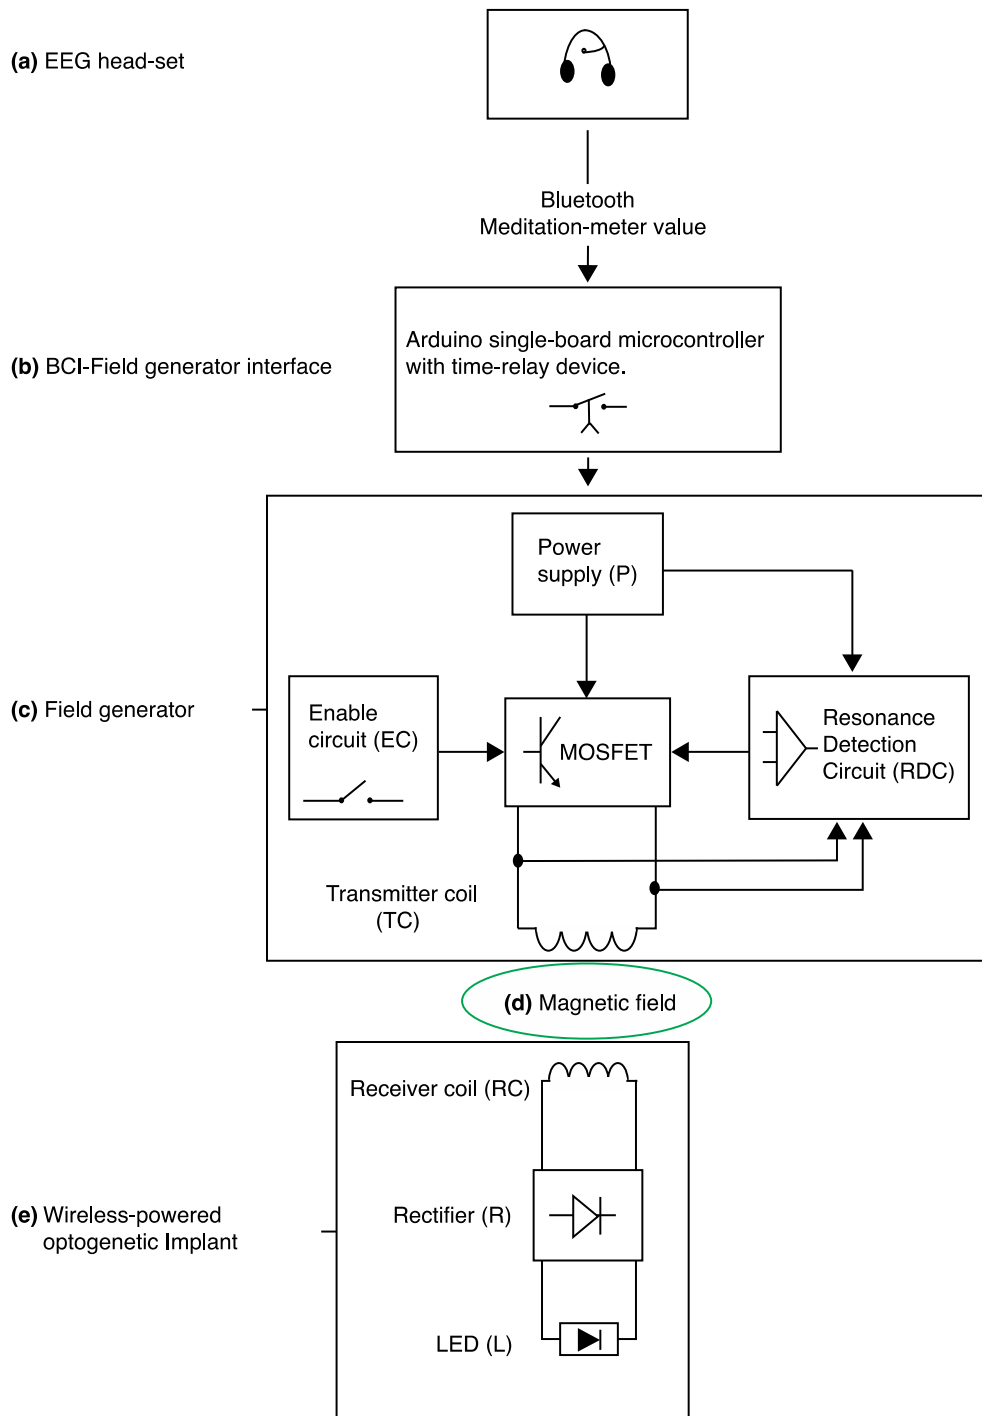

**Supplementary Figure 5 | Schematic of the electronic components of the mind-controlled transgene expression device.** Electronic wire diagram of the electronic components shown in Figure 5 of the main text: **(a)** Electroencephalography (EEG) head-set, **(b)** Arduino single-board microcontroller, **(c)** transmitter-coil (TC)-containing field generator (FG), **(d)** inductively linked receiver coil-containing **(e)** wireless powered optogenetic implant.

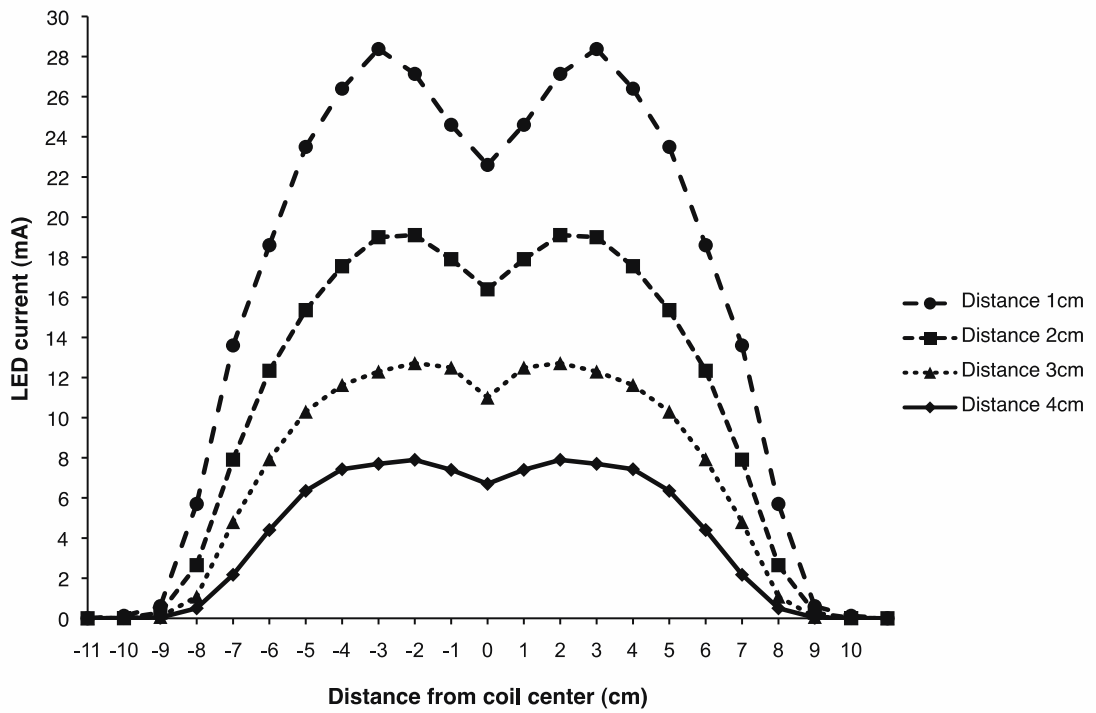

**Supplementary Figure 6 | Distance-dependent coupling intensity of the wireless-powered optogenetic implant and the field generator.** Measurement of the NIR-LED of the wireless-powered optogenetic implant in the space above the field generator.

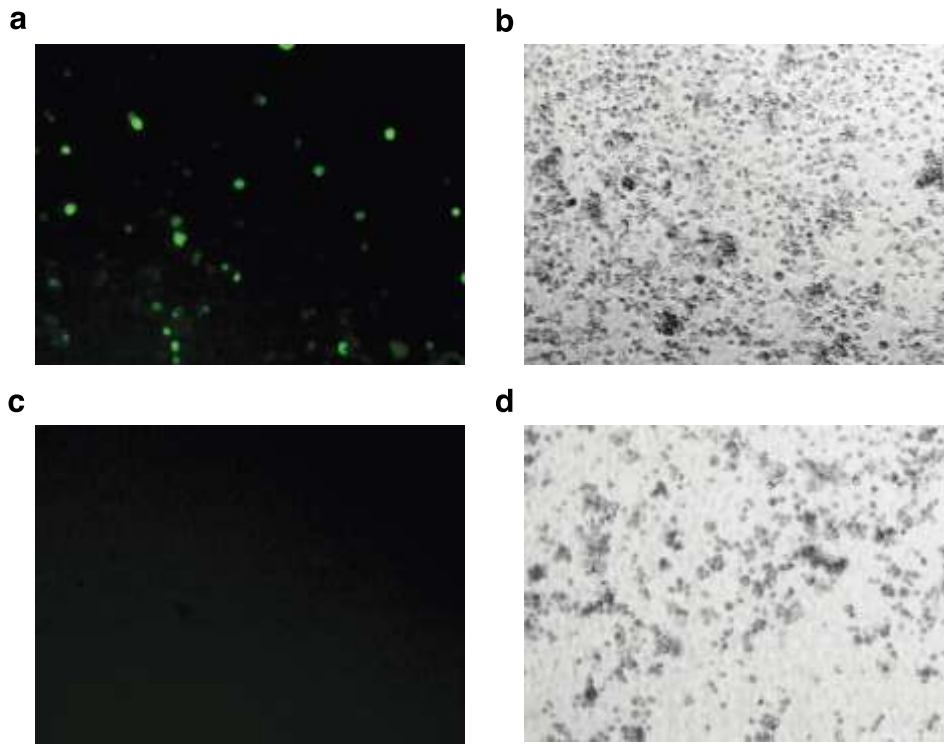

**Supplementary Figure 7 | Virus permeability of the wireless-powered optogenetic implant's cultivation chamber.** Fluorescence (a, c) and bright-field (b, d) micrographs of HEK-293F cells grown inside (a) and outside (c) of the wireless-powered optogenetic implant 72h after infection of the inside population with EYFP-transducing lentiviral particles. Due to the <math><300\text{kDa}</math> molecular cut-off, lentiviral particles are unable to cross the semi-permeable polyethersulfone membrane of the culture chamber.



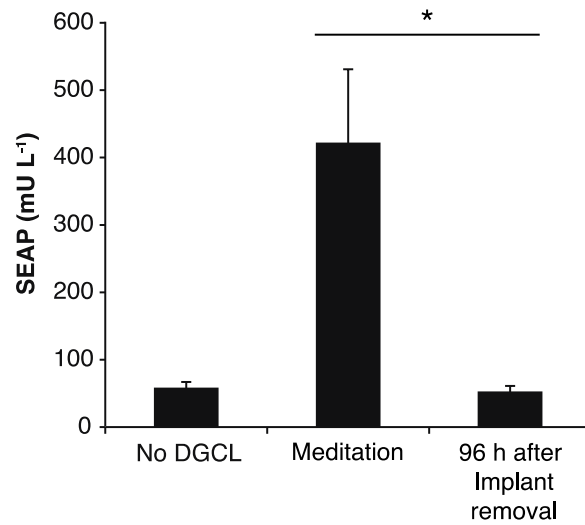

**Supplementary Figure 8 | Blood SEAP levels before and after surgical removal of the wireless-powered optogenetic implants.** The wireless-powered optogenetic implants of mice whose blood SEAP levels were controlled by a human subject's meditation (relaxation) were surgically explanted after 48h the serum SEAP levels were again profiled 4 days later. The identical treatment group carrying the implant for the entire period of 6 days and isogenic animals containing DGCL-deficient implants were used as controls. Data are mean  $\pm$  SD; statistics by two-tailed t test; n=5 mice. \* $P < 0.05$ .

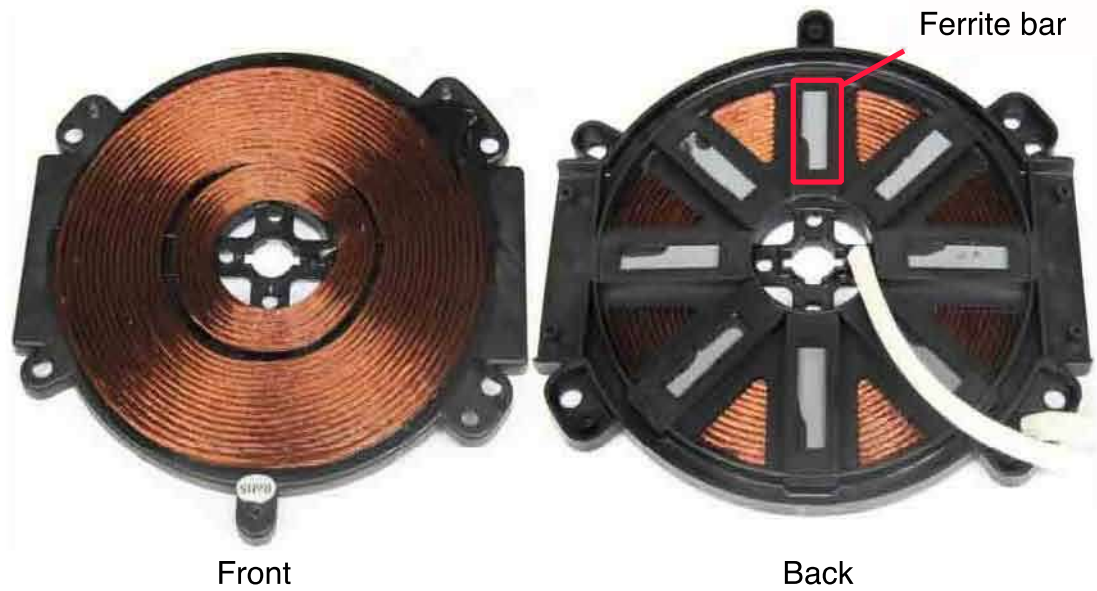

**Supplementary Figure 9 | Flat coil.** Front and back view of the flat coil containing 21 turns of a copper thread assembled from 50 parallel 0.35mm copper wires to minimize electrical resistance and 8 axially fixed rectangular ferrite bars at the bottom of the flat coil to guide the field lines and increase magnetic efficiency.

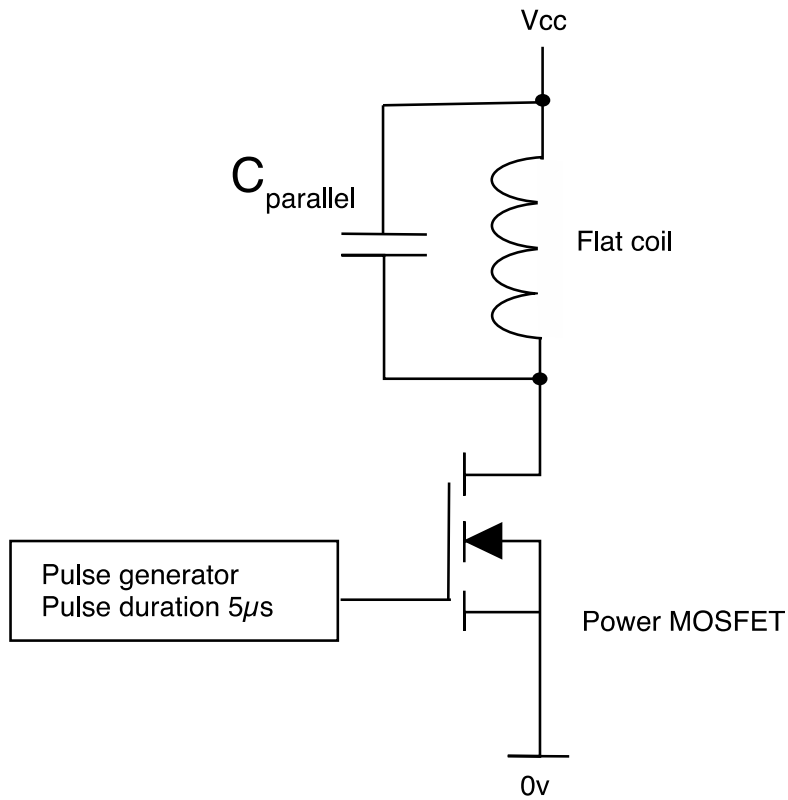

**Supplementary Figure 10 | Schematic of the transmitter-coil circuit.** The transmitter coil (TC) consists of a flat coil connected to a parallel capacitor, a power-managing metal-oxide-semiconductor field-effect transistor (MOSFET) and a pulse-producing synthesized function generator (FG).

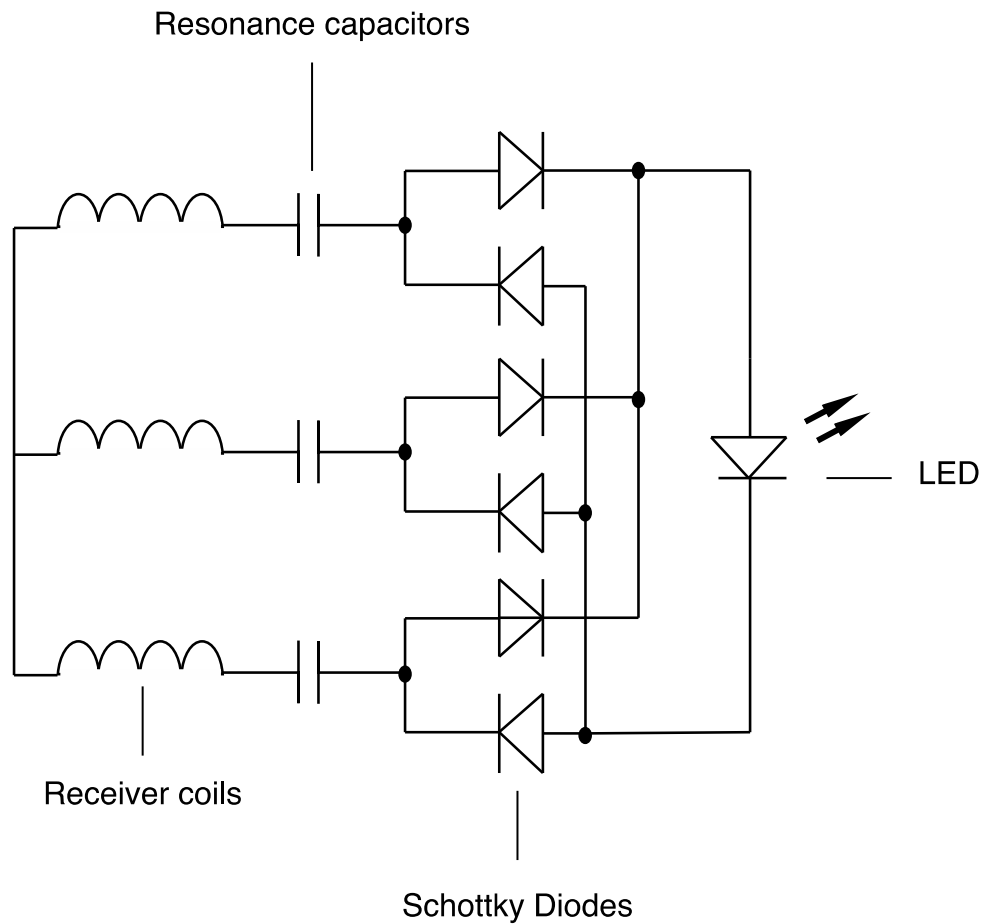

**Supplementary Figure 11 | Schematic of the receiver circuit.** Three orthogonal receiver coils connected to three in-series resonance capacitors and a rectifier circuit composed of six Schottky diodes powering the NIR-light LED.

**Supplementary Table 1.** Plasmids and oligonucleotides used and designed in this study

| Plasmid                   | Description and Cloning Strategy                                                                                                                                                                                                                                                                                                                                                                                                                                               | Reference or Source         |
|---------------------------|--------------------------------------------------------------------------------------------------------------------------------------------------------------------------------------------------------------------------------------------------------------------------------------------------------------------------------------------------------------------------------------------------------------------------------------------------------------------------------|-----------------------------|
| pcDNA3.1(+)               | Constitutive P <sub>hCMV</sub> -driven mammalian expression vector (P <sub>hCMV</sub> -MCS-pA).                                                                                                                                                                                                                                                                                                                                                                                | Invitrogen                  |
| pCD/NL/BH*                | HIV-1-derived GAG/Pol/TAT-encoding helper plasmid (P <sub>hCMV</sub> -GAG-Pol-TAT-pA).                                                                                                                                                                                                                                                                                                                                                                                         | (1)                         |
| pET15b::mYPet-ycgR-mCyPet | Constitutive prokaryotic expression vector encoding mYPet-YcgR-mCyPet (P <sub>T7</sub> -mYPet-YcgR-mCyPet).                                                                                                                                                                                                                                                                                                                                                                    | (2)                         |
| pGEM <sup>®</sup> -T Easy | Vector for cloning of PCR products.                                                                                                                                                                                                                                                                                                                                                                                                                                            | Promega                     |
| pLTR-G                    | Constitutive mammalian VSV-G expression vector (5'LTR-VSV-G-pA).                                                                                                                                                                                                                                                                                                                                                                                                               | (3)                         |
| pMM1                      | Constitutive pcDNA3.1(+)-derived expression vector with modified MCS (P <sub>hCMV</sub> -MCS-pA; MCS, <i>EcoRI</i> -ATG- <i>SpeI</i> - <i>NheI</i> - <i>BamHI</i> -STOP- <i>XbaI</i> - <i>HindIII</i> - <i>FseI</i> -pA). pcDNA3.1 was PCR-amplified using oligonucleotides OMM1 (5'- <u>cggatccaccggtgtctagaaagctttgaggccggcctgcagg</u> GATCAGCCTCGACTGTGCC TTC-3') and OMM2 (5'- <u>ctagcactagtcatggtgaattcgattaatcaattgacgcgtGGAGATCTCCCGATCCGTC</u> -3') and self-ligated. | Mueller et al., unpublished |
| pNLK8                     | HIV-1-derived constitutive lentiviral EYFP expression vector (5'LTR- $\psi^+$ -ori <sub>SV40</sub> -cPPT-RRE-P <sub>hEF1<math>\alpha</math></sub> -EYFP-3'LTR <sub><math>\Delta</math>U3</sub> ).                                                                                                                                                                                                                                                                              | (4)                         |
| pSBC-2                    | Constitutive mammalian expression vector (P <sub>SV40</sub> -MCS-pA).                                                                                                                                                                                                                                                                                                                                                                                                          | (5)                         |
| pSEAP2-control            | Constitutive mammalian SEAP expression vector (P <sub>SV40</sub> -SEAP-pA).                                                                                                                                                                                                                                                                                                                                                                                                    | Clontech                    |
| pWW512                    | Constitutive mammalian hIFN- $\beta$ expression vector (P <sub>hEF1<math>\alpha</math></sub> -hIFN- $\beta$ -pA).                                                                                                                                                                                                                                                                                                                                                              | (6)                         |
| pSTING                    | Constitutive mammalian STING expression vector (P <sub>hCMV</sub> -STING-pA).                                                                                                                                                                                                                                                                                                                                                                                                  | IMAGE: IRAVp968F0688D       |
| pUC57                     | pUC19-derived prokaryotic expression vector.                                                                                                                                                                                                                                                                                                                                                                                                                                   | Genescript                  |
| pMFO1                     | Custom-designed pUC57-derived vector containing the human codon-optimized PDE <sub>TBD1265</sub> .                                                                                                                                                                                                                                                                                                                                                                             | This work                   |
| pMFO2                     | Custom-designed pUC57-derived vector containing the human codon-optimized DGCA <sub>CC3285</sub> .                                                                                                                                                                                                                                                                                                                                                                             | This work                   |
| pMFO4                     | Custom-designed pUC57-derived vector containing the human codon-optimized PDE <sub>yahA</sub> .                                                                                                                                                                                                                                                                                                                                                                                | This work                   |
| pMFO5                     | Custom-designed pUC57-derived vector containing the human codon-optimized DGCL.                                                                                                                                                                                                                                                                                                                                                                                                | This work                   |
| pMFO6                     | Custom-designed pUC57-derived vector containing the human codon-optimized mYPet-YcgR-mCyPet.                                                                                                                                                                                                                                                                                                                                                                                   | This work                   |

|         |                                                                                                                                                                                                                                                                                                                                                                                                                                                  |           |
|---------|--------------------------------------------------------------------------------------------------------------------------------------------------------------------------------------------------------------------------------------------------------------------------------------------------------------------------------------------------------------------------------------------------------------------------------------------------|-----------|
| pKZY81  | Constitutive mammalian mYPet-YcgR-mCyPet expression vector (P <sub>SV40</sub> -mYPet-YcgR-mCyPet-pA). mYPet-YcgR-mCyPet was excised from pMFO6 using <i>EcoRI/PstI</i> and cloned into the corresponding sites ( <i>EcoRI/PstI</i> ) of pSBC-2.                                                                                                                                                                                                  | This work |
| pKZY113 | Constitutive mammalian DGCL expression vector (P <sub>SV40</sub> -DGCL-pA). DGCL was excised from pMFO5 using <i>EcoRI/PstI</i> and cloned into the corresponding sites ( <i>EcoRI/PstI</i> ) of pSBC-2.                                                                                                                                                                                                                                         | This work |
| pKZY119 | Constitutive mammalian PDE <sub>yahA</sub> expression vector (P <sub>SV40</sub> -PDE <sub>yahA</sub> -pA). PDE <sub>yahA</sub> was excised from pMSO2 using <i>EcoRI/PstI</i> and cloned into the corresponding sites ( <i>EcoRI/PstI</i> ) of pSBC-2.                                                                                                                                                                                           | This work |
| pKZY120 | Constitutive mammalian PDE <sub>TBD1265</sub> expression vector (P <sub>SV40</sub> -PDE <sub>TBD1265</sub> -pA). PDE <sub>TBD1265</sub> was excised from pMFO1 using <i>EcoRI/PstI</i> and cloned into the corresponding sites ( <i>EcoRI/PstI</i> ) of pSBC-2.                                                                                                                                                                                  | This work |
| pKZY121 | Constitutive mammalian DGCA <sub>CC3285</sub> expression vector (P <sub>SV40</sub> -DGCA <sub>CC3285</sub> -pA). DGCA <sub>CC3285</sub> was excised from pMFO2 using <i>EcoRI/PstI</i> and cloned into the corresponding sites ( <i>EcoRI/PstI</i> ) of pSBC-2.                                                                                                                                                                                  | This work |
| pSO1    | P <sub>hIFN<math>\beta</math></sub> -driven SEAP expression vector (P <sub>hIFN<math>\beta</math></sub> -SEAP-pA). P <sub>hIFN<math>\beta</math></sub> was PCR-amplified from HEK-293 genomic DNA using oligonucleotides OSO1 (5'-aatgagcttagcgaattcTCAGGTCGTTTGCTTTC-3') and OSO2 (5'atgaaagcttcATGTTGACAACACGAACAGTG-3') restricted with <i>NheI/HindIII</i> and cloned into the corresponding site ( <i>NheI/HindIII</i> ) of pSEAP2-control. | This work |
| pSO2    | P <sub>IFN(AC+)</sub> -driven SEAP expression vector (P <sub>IFN(AC+)</sub> -SEAP-pA). The IRF3 operator sites of P <sub>hIFN<math>\beta</math></sub> were sequence optimized by PCR-based site-directed mutagenesis using the oligonucleotides OSO3 (5'-AaAGGgAAACTGAAAGGGAAaAACTGAAAGTGGGAAATTCCTCTG-3') and OSO4 (5'-GTCATT TACATTTTAGTAGTTTC-3') and pSO1 as template.                                                                       | This work |
| pSO3    | P <sub>IFN(ACD+)</sub> -driven SEAP expression vector (P <sub>IFN(ACD+)</sub> -SEAP-pA). The IRF3 operator sites of P <sub>IFN(AC+)</sub> were space optimized by PCR-based site-directed mutagenesis using the oligonucleotides OSO5 (5'-AAAGGG AA ACTGAAAGGGAACTGAAAGTGGGAAATTCCTCTG -3') and OSO4 (5'-GTCATTTACATTTT AGTAGTTTC-3') and pSO2 as template.                                                                                      | This work |
| pSO4    | Constitutive mammalian DGCL expression vector (P <sub>hCMV</sub> -DGCL-pA). DGCL was excised from pKZY113 using <i>EcoRI/HindIII</i> and cloned into the corresponding sites ( <i>EcoRI/HindIII</i> ) of pMM1.                                                                                                                                                                                                                                   | This work |

**Oligonucleotides:** restriction endonuclease-specific sites are underlined in oligonucleotide sequences. Annealing base pairs contained in oligonucleotide sequences are shown in capital letters.

**Abbreviations:** 3'LTR<sub>AU3</sub>, HIV-1-derived enhancer-free 3'LTR variant; 5'LTR, HIV-1-derived 5' long terminal repeat; **c-di-GMP**, cyclic diguanosine monophosphate; **cPPT**, central polypurine tract; **DGCA<sub>CC3285</sub>**, feedback-inhibited CC3285 diguanylate cyclase A of *Caulobacter crescentus* (ATCC 19089/CB15) (human codon-optimized DGCA<sub>CC3285</sub>, GenBank ID: KM591193) (7); **DGCL**, Near infrared-light-activated diguanylate cyclase derived from *Rhodobacter sphaeroides* BphG1 (ATCC BAA-808; N-terminal PAS-GAF-PHY-GGDEF portion of BphG1 (Q8VRN4\_RHOSH) and the catalytic diguanylate cyclase domain GGDEF which is photo-activated by its cognate PAS-GAF-PHY phytochrome) (human codon-optimized DGCL, GenBank ID: KM591196) (8); **EGFP**, enhanced GFP; **EYFP**, yellow-fluorescent GFP variant; **GFP**, enhanced green-fluorescent protein; **GAG**, HIV-derived core protein; **hIFN- $\beta$** , human interferon beta; **HIV**, human immunodeficiency virus; **IRF3**, interferon regulatory factor 3; **pA**, polyadenylation signal; **MCS**, multiple cloning site; **mYPet-**

**YcgR-mCyPet**, N-terminally His<sub>6</sub>-tagged c-di-GMP biosensor consisting of a central *Salmonella typhimurium*-derived diguanylate receptor domain (YcgR) flanked by yellow (mYPet) and cyan (mCYPet) fluorescent protein domains; **ori<sub>SV40</sub>**, simian virus 40-derived origin of replication; **PDE<sub>yahA</sub>**, cyclic diguanylate (c-di-GMP)-degrading phosphodiesterase of *Escherichia coli* (ATCC 8937) (human codon-optimized PDE<sub>yahA</sub>, GenBank ID: KM591194 (9)); **PDE<sub>TBD1265</sub>**, cyclic diguanylate (c-di-GMP)-degrading phosphodiesterase of *Thiobacillus denitrificans* (ATCC 25259) (human codon-optimized PDE<sub>TBD1265</sub>, GenBank ID: KM591195)(10); **P<sub>hCMV</sub>**, human cytomegalovirus immediate early promoter; **P<sub>hCMVmin</sub>**, minimal version of P<sub>hCMV</sub>; **P<sub>hEF1α</sub>**, human elongation factor 1 alpha promoter; **P<sub>hIFNβ</sub>**, human interferon beta promoter (GenBank ID: KM591197); **P<sub>IFN(AC+)</sub>**, modified P<sub>hIFNβ</sub> containing sequence-optimized IRF3 operator sites (GenBank ID: KM591198) (11); **P<sub>IFN(ACD+)</sub>**, P<sub>IFN(AC+)</sub> containing space-optimized IRF3 operator sites (GenBank ID: KM591199) (25); **Pol**, HIV virion-associated polymerase; **P<sub>SV40</sub>**, simian virus 40 promoter; **P<sub>T7</sub>**, bacteriophage T7 promoter; **RRE**, HIV-1-derived Rev response element; **SEAP**, human placental secreted alkaline phosphatase; **STING**, mouse stimulator of interferon genes; **TAT**, HIV-1-derived transactivator of transcription; **VSV-G**, vesicular stomatitis virus protein G; **ψ<sup>+</sup>**, extended HIV-1-derived lentiviral packaging signal.

### Supplementary References

1. Mochizuki, H., Schwartz, J.P., Tanaka, K., Brady, R.O. & Reiser, J. High-titer human immunodeficiency virus type 1-based vector systems for gene delivery into nondividing cells. *J. Virol.* **72**, 8873-8883 (1998).
2. Christen, M., Kulasekara, H.D., Christen, B., Kulasekara, B.R., Hoffman, L.R. & Miller, S.I. Asymmetrical distribution of the second messenger c-di-GMP upon bacterial cell division. *Science* **328**, 1295-1297 (2010).
3. Reiser, J., Harmison, G., Kluepfel-Stahl, S., Brady, R.O., Karlsson, S., & Schubert, M. Transduction of nondividing cells using pseudotyped defective high-titer HIV type 1 particles. *Proc. Natl. Acad. Sci. USA* **93**, 15266-15271 (1996).
4. Link, N. *et al.* Therapeutic protein transduction of mammalian cells and mice by nucleic acid-free lentiviral nanoparticles. *Nucleic Acids Res.* **34**, e16 (2006).
5. Nuthmann, V., Dirks, W. & Drexler, H.G. Transient expression of the tartrate-resistant acid phosphatase (TRAP) gene in hamster cells: a pilot study. *Leukemia* **7**, 1960-1964 (1993).
6. Weber, W. *et al.* Gas-inducible transgene expression in mammalian cells and mice. *Nat. Biotechnol.* **22**, 1440-1444 (2004).
7. Christen, B. *et al.* Allosteric control of cyclic di-GMP signaling. *J. Biol. Chem.* **281**, 32015-32024 (2006).
8. Tarutina, M., Ryjenkov, D.A. & Gomelsky, M. An unorthodox bacteriophytochrome from *Rhodobacter sphaeroides* involved in turnover of the second messenger c-di-GMP. *J. Biol. Chem.* **281**, 34751-34758 (2006).
9. Schmidt, A.J., Ryjenkov, D.A. & Gomelsky, M. The ubiquitous protein domain EAL is a cyclic diguanylate-specific phosphodiesterase: enzymatically active and inactive EAL domains. *J. Bacteriol.* **187**, 4774-4781 (2005).
10. Tchigvintsev, A. *et al.* Structural insight into the mechanism of c-di-GMP hydrolysis by EAL domain phosphodiesterases. *J. Mol. Biol.* **402**, 524-538 (2010).
11. Escalante, C.R., Nistal-Villan, E., Shen, L., Garcia-Sastre, A. & Aggarwal, A.K. Structure of IRF-3 bound to the PRDIII-I regulatory element of the human interferon-beta enhancer. *Mol. Cell* **26**, 703-716 (2007).
